# Supplementary material for: Dynamic Gene Regulation of Protein Storage in Developing Oat Grains
Source: Research Square preprint supplement (doi:10.21203/rs.3.rs-6409365/v1), 2025-05-05
Supplement: Supplementary file 1 [file 2caa11b523e7cf7a71b55b9e.xlsx]

## Sheet:  primer
Gene	Annotation	Primers(5'-3’)	Tm(℃)	Amplicon(bp)
Actin	肌动蛋白	Forward: TGCCATCCTTCGTCTTGACC	60	172
		Reverse: GGCATTCTCCAGCTCCTGTT	60
AVESA.00001b.r3.3Ag0001743	异柠檬酸脱氢酶	Forward: AGGTGGCTATGTTTGGGCAT	59.66	162
		Reverse:TAATGGCGTGTGACCGTACC	60.11
AVESA.00001b.r3.7Cg0003088	苹果酸脱氢酶	Forward: CGACAACTCTGCTCTGCTCT	59.76	200
		Reverse: GAGACCTCCTCCATCTGGGA	59.74
AVESA.00001b.r3.7Ag0001223	丙酮酸脱氢酶 E1 组份	Forward:AAGGACGCCAACTTCTACGG	60	98
		Reverse: GTCCCCTCCTTCCTGTACCT	60
AVESA.00001b.r3.2Ag0002073	γ-氨基丁酸转氨酶	Forward:CTCACTGGTCTTCCTGCGTT	60	208
		Reverse:CACCCATTACAGGCTCAGC	60
AVESA.00001b.r3.2Dg0001025	琥珀酸-半醛脱氢酶	Forward: ATTCCCCCAACCCTACCTG	59.9	148
		Reverse: TGACAACGACAGTGCATCC	59.9
AVESA.00001b.r3.7Dg0000915	谷氨酸脱羧酶	Forward: GCGGCAAACTCATCATGGAC	59.9	207
		Reverse: ACTTCCTCTTGAACGCCAGG	60
AVESA.00001b.r3.1Ag0002942	醇脱氢酶	Forward: TTGTTCTCAAGAGCGGGCAT	60	129
		Reverse:TGAACGGAGTGAGCAGTGTC	60
AVESA.00001b.r3.5Cg0003039	醛脱氢酶	Forward: TGAGATTGCTGCACTGGAGG	60	123
		Reverse: CCGTGGATCTTGTCAACCCA	60
AVESA.00001b.r3.4Cg0003498	磷酸烯醇丙酮酸羧激酶	Forward: AGTACATCCCCAACGCCAAG	60	176
		Reverse: GATGCCGTCCTCTGTACCAG	59.5
AVESA.00001b.r3.2Cg0002157	苹果酸合成酶	Forward: GGCGGTGGGACTACATCTTC	60	127
		Reverse: CGGATGAGGAGGTGGGAGT	60
	改成序列
