# Supplementary material for: Dynamic Gene Regulation of Protein Storage in Developing Oat Grains
Source: Research Square preprint supplement (doi:10.21203/rs.3.rs-6409365/v1), 2025-05-05
Supplement: Supplementary file 2 [file d574908a49dc555c6af9e222.xlsx]

## Sheet: Sheet1
	Number of cases	mean	SD	SE	95% confidence interval		Max	Min
					lower limit	limit
MC5	3	8.8909	0.27824	0.160642	8.19971	9.58209	8.5841	9.1269
MC10	3	9.73093	0.169563	0.0978975	9.30971	10.1522	9.5721	9.9095
MC15	3	11.6424	0.0946154	0.0546263	11.4074	11.8775	11.5841	11.7516
MC20	3	12.9943	0.398969	0.230345	12.0032	13.9854	12.5371	13.2721
MC25	3	13.8285	0.129104	0.0745381	13.5078	14.1492	13.7397	13.9766
MC30	3	14.6478	0.242785	0.140172	14.0447	15.2509	14.4915	14.9275
HZ5	3	11.3119	0.262654	0.151643	10.6595	11.9644	11.0348	11.5572
HZ10	3	12.6811	0.185296	0.106981	12.2208	13.1414	12.5244	12.8856
HZ15	3	15.298	0.11776	0.0679887	15.0054	15.5905	15.1811	15.4166
HZ20	3	18.1252	0.220397	0.127246	17.5777	18.6727	17.899	18.3393
HZ25	3	19.5416	0.256003	0.147804	18.9057	20.1775	19.2473	19.7128
HZ30	3	20.8935	0.258893	0.149472	20.2504	21.5367	20.6065	21.1094
Rates of protein accumulation
	MC	HZ
5-10	8.63261	10.7967
10-15	16.4184	17.1062
15-20	10.4033	15.5982
20-25	6.03271	7.2483
25-30	5.59333	6.47058
